# Supplementary material
Source: publisher figshare collection journal article supplement (https://acs.figshare.com/ndownloader/files/20046584)
Supplement: Supplementary file 1 [file 20046584]

# Supporting information: Fast biofilm penetration and anti-PAO1 activity of nebulized azithromycin in nanoarchaeosomes

María Julia Altube<sup>1</sup>, Melina María Belén Martínez<sup>2</sup>, Barbara Malheiros<sup>3</sup>, Paulo César Maffía<sup>2</sup>, Leandro Ramos Souza Barbosa<sup>3</sup>, Maria Jose Morilla<sup>1</sup> and Eder Lilia Romero<sup>1</sup>

1. Nanomedicine Research and Development Centre, Science and Technology Department, National University of Quilmes, Bernal, Buenos Aires, Argentina

2. Laboratorio de Microbiología Molecular, Instituto de Microbiología Básica y Aplicada, Universidad Nacional de Quilmes, Bernal, Buenos Aires, Argentina

3. Institute of Physics, University of São Paulo (USP), São Paulo, Brazil

## Table of contents

|                                                                                                            |           |
|------------------------------------------------------------------------------------------------------------|-----------|
| S.1 Small angle x ray scattering (SAXS) measurements.                                                      | Page SI 1 |
| S.2 Activity of AZ-nanovesicles against <i>S. aureus</i> .                                                 | Page SI 2 |
| S.3 Activity of AZ-nanovesicles against PAO1: virulence factors, effect of mucins and biofilm penetration. | Page SI 2 |
| S.3 References.                                                                                            | Page SI 3 |

## S.1 Small angle x ray scattering (SAXS) measurements

Data analysis was evaluated according to:

$$I(q) \propto k (w_1 P_{Uni}(q) + w_2 P_{MLV}(q)) \quad (\text{equation 1})$$

Where  $I(q)$  is (scattered intensity),  $k$  is related to the experimental setup and must be the same for a set of scattering curves measured with the same experimental set up. In equation 1,  $w_1$  and  $w_2$  are the weight in the scattering curve of the uni- and multilamellar structures, respectively. Using this approach, it is possible to describe that:

$$P_{Uni}(q) = \frac{2\pi P_t(q)}{q^2} \text{ and } P_{Mult}(q) = \frac{2\pi P_t(q)}{q^2} S_{mult}(q) \quad (\text{equation 2})$$

where  $P_t(q)$  is the infinity bilayer form factor and can be modelled considering that the membranes are composed by three distinct regions: the polar head group, the paraffinic ( $CH_2$ ) chains and the inner most methyl group ( $CH_3$ ) region. In this scenario, each region has its own electron density and thickness. Thus, it is possible to write  $P_t(q)$  as [1-2]:

$$P_t(q) = \left\{ \frac{2}{q} \left\{ \Delta\rho_{CH_3} \sin(qR_{CH_3}) + \Delta\rho_{par} (\sin(q(R_{CH_3} + R_{par})) - \sin(qR_{CH_3})) + \Delta\rho_{pol} (\sin(q(R_{CH_3} + R_{par} + R_{pol})) - \sin(q(R_{CH_3} + R_{par}))) \right\} \right\} \quad (\text{equation 3})$$

where  $\Delta\rho_{CH_3} = \rho_{CH_3} - \rho_{sol}$ ;  $\Delta\rho_{pol} = \rho_{pol} - \rho_{sol}$  and  $\Delta\rho_{par} = \rho_{par} - \rho_{sol}$ . The lipid bilayer thickness in this model is  $2(R_{pol} + R_{par} + R_{CH_3})$ . During the fitting procedure, some of these parameters were allowed to vary within a narrow range:  $R_{CH_3}$  ( $1.5 \text{ \AA} < R_{CH_3} < 3.5 \text{ \AA}$ ),  $\rho_{CH_3}$  ( $0.15 \text{ e/\AA}^3 < \rho_{CH_3} < 0.20 \text{ e/\AA}^3$ ) and  $\rho_{par}$  ( $0.25 \text{ e/\AA}^3 < \rho_{par} < 0.30 \text{ e/\AA}^3$ ), in accordance with data from the literature [1,3,4]

The other  $P_t(q)$  parameters could vary in a corresponding broader range. All SAXS curves were analysed with the global fitting procedure using GENFIT software [5].

For the multilamellar vesicles (MLV) the Modified Caillé Theory (MCT) [2,6] was used to calculate  $S(q)$  in equation 1. This model considers the bending of the membrane and the fluctuations in the space between bilayers by a statistical approach. For that, a disorder parameter  $\eta_{Caillé}$  is added to the equation, that can be written as [6,7]:

$$S(q) = N + 2 \left\{ \sum_{n=1}^{N-1} \left[ (N-n) \cos(nqd) e^{-0.5772 \eta_{Caillé} \left(\frac{qd}{2\pi}\right)^2} (\pi n)^{-\eta_{Caillé} \left(\frac{qd}{2\pi}\right)^2} \right] \right\} \quad (\text{equation 4})$$

where  $N$  is the number of stacked bilayers,  $d$  is the repetitions distance (or the centers of two consecutive bilayers) and  $\eta_{Caillé}$  is described as [6]:

$$\eta_{Caillé} = \frac{\pi k_B T}{2d^2 \sqrt{KB}} \quad (\text{equation 5})$$

where  $K$  is bending modulus of the bilayers and  $B$  is the bulk modulus for compression. During the fitting process,  $N$  and  $\eta$  and  $d$  were allowed to vary as well.

## S.2 Activity of AZ-nanovesicles against *S. aureus*

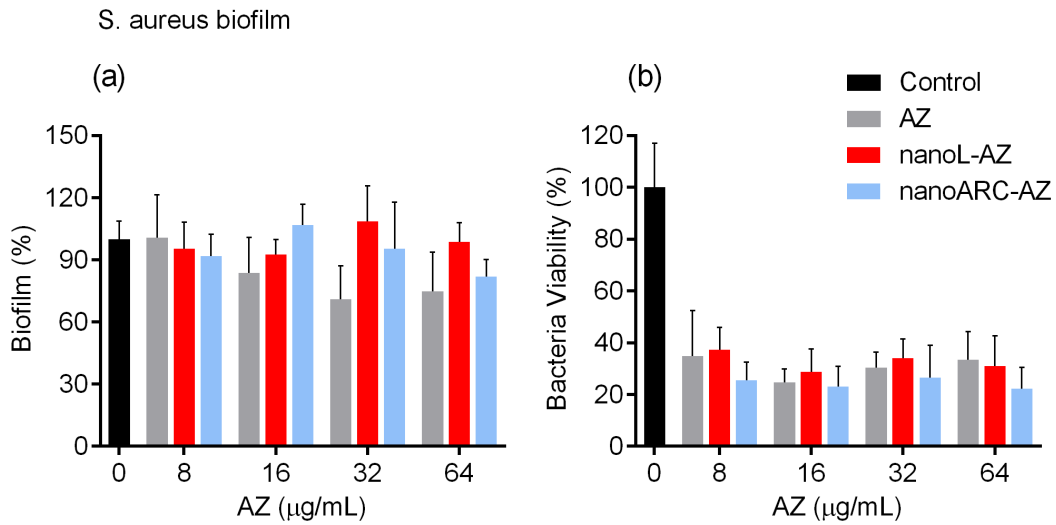

Figure S.2 Disruption of preformed biofilm (a) and antibacterial activity (b) of *S. aureus* upon 24 h incubation with AZ or AZ-nanovesicles.

## S.3 Activity of AZ-nanovesicles against PAO1: virulence factors, effect of mucins and biofilm penetration

The number of nanovesicles per milliliter of suspension was calculated with equation 6<sup>8</sup>.

$$N_{nv} = \frac{M_{lipid} N_A}{1000 N_{tot}} \quad (\text{equation 6})$$

$N_A$  is the Avogadro number and it is equal to  $6.02 \times 10^{23}$ .  $M_{lipid}$  is the molar concentration of lipid. The mean MW used for lipids was  $10^3$  daltons.  $N_{tot}$  is the total number of lipids per nanovesicle and was calculated with equation 7.

$$N_{tot} = 17.69 \left[ \left( \frac{d}{2} \right)^2 + \left( \frac{d}{2} - 5 \right)^2 \right] \quad (\text{equation 7})$$

$d$  is the mean size of nanovesicles. The mean size used for nanovesicles was 150 nm.

#### S.4 References

1. Domingues, M. M.; Bianconi, M. L.; Barbosa, L. R.; Santiago, P. S.; Tabak, M.; Castanho, M. A.; Itri, R.; Santos, N. C., rBPI21 interacts with negative membranes endothermically promoting the formation of rigid multilamellar structures. *Biochimica et Biophysica Acta (BBA)-Biomembranes* **2013**, *1828* (11), 2419-2427.
2. Fernandez, R. M.; Riske, K. A.; Amaral, L. Q.; Itri, R.; Lamy, M. T., Influence of salt on the structure of DMPG studied by SAXS and optical microscopy. *Biochimica et Biophysica Acta (BBA)-Biomembranes* **2008**, *1778* (4), 907-916.
3. Rozenfeld, J. H.; Duarte, E. L.; Barbosa, L. R.; Lamy, M. T., The effect of an oligonucleotide on the structure of cationic DODAB vesicles. *Physical Chemistry Chemical Physics* **2015**, *17* (11), 7498-7506.
4. da Costa-Silva, T. A.; Galisteo, A. J.; Lindoso, J. A. L.; Barbosa, L. R.; Tempone, A. G., Nanoliposomal buparvaquone immunomodulates *Leishmania infantum*-infected macrophages and is highly effective in a murine model. *Antimicrobial agents and chemotherapy* **2017**, *61* (4), e02297-16.
5. Spinozzi, F.; Ferrero, C.; Ortore, M. G.; De Maria Antolinos, A.; Mariani, P., GENFIT: software for the analysis of small-angle X-ray and neutron scattering data of macromolecules in solution. *Journal of applied crystallography* **2014**, *47* (3), 1132-1139.
6. Zhang, R.; Tristram-Nagle, S.; Sun, W.; Headrick, R.; Irving, T.; Suter, R. M.; Nagle, J. F., Small-angle x-ray scattering from lipid bilayers is well described by modified Caillé theory but not by paracrystalline theory. *Biophysical journal* **1996**, *70* (1), 349-357.
7. Zhang, R.; Suter, R. M.; Nagle, J. F., Theory of the structure factor of lipid bilayers. *Physical Review E* **1994**, *50* (6), 5047.
8. NanoSciences, E. <http://www.liposomes.org/2009/01/number-of-lipid-molecules-per-liposome.html> (accessed April 2019).
